# Supplementary material
Source: PubMed Central journal article supplement (PMC6189557)
Supplement: rsta20170403supp1.pdf [file rsta20170403supp1.pdf]

Model 1 (figure 4)

| Segment age (Ga)        | Net growth rate       |                    | Pre-3 Ga crust                       | Post-3 Ga crust                      | Total                                | Cumulative volume (%PVCC) | Generation rate (km <sup>3</sup> /yr) | Volume generated (km <sup>3</sup> ) | Pre-3 Ga crust                         | Post-3 Ga crust                        | Total                                  | Volume destroyed (km <sup>3</sup> ) | Volume left at present (km <sup>3</sup> ) | Cumulative volume at present (km <sup>3</sup> ) | Cumulative volume (%PVCC) |
|-------------------------|-----------------------|--------------------|--------------------------------------|--------------------------------------|--------------------------------------|---------------------------|---------------------------------------|-------------------------------------|----------------------------------------|----------------------------------------|----------------------------------------|-------------------------------------|-------------------------------------------|-------------------------------------------------|---------------------------|
|                         | (km <sup>3</sup> /yr) | (km <sup>3</sup> ) | cumulative volume (km <sup>3</sup> ) | cumulative volume (km <sup>3</sup> ) | cumulative volume (km <sup>3</sup> ) |                           |                                       |                                     | destruction rate (km <sup>3</sup> /yr) | destruction rate (km <sup>3</sup> /yr) | destruction rate (km <sup>3</sup> /yr) |                                     |                                           |                                                 |                           |
| 4.5-4.0                 | <b>3.0</b>            | 1.5E+09            | 1.5E+09                              | -                                    | 1.5E+09                              | 21                        | <b>3.00</b>                           | 1.50E+09                            | <b>0.04</b>                            | -                                      | <b>0.04</b>                            | 1.47E+09                            | 3.38E+07                                  | 3.38E+07                                        | 0.5                       |
| 4.0-3.5                 | <b>2.8</b>            | 1.4E+09            | 2.9E+09                              | -                                    | 2.9E+09                              | 40                        | <b>3.10</b>                           | 1.55E+09                            | <b>0.30</b>                            | -                                      | <b>0.30</b>                            | 1.55E+09                            | 0.00E+00                                  | 3.38E+07                                        | 0.5                       |
| Pre-3 Ga crust 3.5-3.0  | <b>4.3</b>            | 2.2E+09            | 5.0E+09                              | -                                    | 5.0E+09                              | 70                        | <b>4.70</b>                           | 2.35E+09                            | <b>0.38</b>                            | -                                      | <b>0.38</b>                            | 2.04E+09                            | 3.07E+08                                  | 3.41E+08                                        | 5                         |
| Post-3 Ga crust 3.0-2.5 | <b>-3.7</b>           | -1.9E+09           | 8.3E+08                              | 2.4E+09                              | 3.2E+09                              | 44                        | <b>4.70</b>                           | 2.35E+09                            | <b>8.42</b>                            | 0.0                                    | <b>8.42</b>                            | 1.67E+08                            | 2.18E+09                                  | 2.53E+09                                        | 35                        |
| 2.5-2.0                 | <b>3.0</b>            | 1.5E+09            | 4.3E+08                              | 4.3E+09                              | 4.7E+09                              | 65                        | <b>4.70</b>                           | 2.35E+09                            | <b>0.80</b>                            | 0.9                                    | <b>1.70</b>                            | 1.70E+09                            | 6.49E+08                                  | 3.17E+09                                        | 44                        |
| 2.0-1.5                 | <b>3.2</b>            | 1.6E+09            | 4.0E+08                              | 5.9E+09                              | 6.3E+09                              | 87                        | <b>4.70</b>                           | 2.35E+09                            | <b>0.07</b>                            | 1.5                                    | <b>1.52</b>                            | 6.73E+08                            | 1.68E+09                                  | 4.85E+09                                        | 67                        |
| 1.5-1.0                 | <b>2.3</b>            | 1.2E+09            | 3.6E+08                              | 7.1E+09                              | 7.4E+09                              | 103                       | <b>4.70</b>                           | 2.35E+09                            | <b>0.07</b>                            | 2.3                                    | <b>2.37</b>                            | 1.66E+09                            | 6.95E+08                                  | 5.55E+09                                        | 77                        |
| 1.0-0.5                 | <b>0.6</b>            | 3.2E+08            | 3.4E+08                              | 7.4E+09                              | 7.8E+09                              | 108                       | <b>4.12</b>                           | 2.06E+09                            | <b>0.04</b>                            | 3.4                                    | <b>3.47</b>                            | 1.07E+09                            | 9.92E+08                                  | 6.54E+09                                        | 91                        |
| 0.5-0                   | <b>-1.1</b>           | -5.7E+08           | 3.4E+08                              | 6.9E+09                              | 7.2E+09                              | 100                       | <b>4.12</b>                           | 2.06E+09                            | <b>0.00</b>                            | 5.2                                    | <b>5.25</b>                            | 1.40E+09                            | 6.61E+08                                  | 7.20E+09                                        | 100                       |

Model 2 (figure 5)

| Segment age (Ga)        | Net growth rate       |                    | Pre-3 Ga crust                       | Post-3 Ga crust                      | Total                                | Cumulative volume (%PVCC) | Generation rate (km <sup>3</sup> /yr) | Volume generated (km <sup>3</sup> ) | Pre-3 Ga crust                         | Post-3 Ga crust                        | Total                                  | Volume destroyed (km <sup>3</sup> ) | Volume left at present (km <sup>3</sup> ) | Cumulative volume at present (km <sup>3</sup> ) | Cumulative volume (%PVCC) |
|-------------------------|-----------------------|--------------------|--------------------------------------|--------------------------------------|--------------------------------------|---------------------------|---------------------------------------|-------------------------------------|----------------------------------------|----------------------------------------|----------------------------------------|-------------------------------------|-------------------------------------------|-------------------------------------------------|---------------------------|
|                         | (km <sup>3</sup> /yr) | (km <sup>3</sup> ) | cumulative volume (km <sup>3</sup> ) | cumulative volume (km <sup>3</sup> ) | cumulative volume (km <sup>3</sup> ) |                           |                                       |                                     | destruction rate (km <sup>3</sup> /yr) | destruction rate (km <sup>3</sup> /yr) | destruction rate (km <sup>3</sup> /yr) |                                     |                                           |                                                 |                           |
| 4.5-4.0                 | <b>3.0</b>            | 1.5E+09            | 1.5E+09                              | -                                    | 1.5E+09                              | 21                        | <b>3.09</b>                           | 1.55E+09                            | <b>0.05</b>                            | -                                      | <b>0.05</b>                            | 1.28E+09                            | 2.63E+08                                  | 2.63E+08                                        | 4                         |
| 4.0-3.5                 | <b>2.8</b>            | 1.4E+09            | 2.9E+09                              | -                                    | 2.9E+09                              | 40                        | <b>3.26</b>                           | 1.63E+09                            | <b>0.48</b>                            | -                                      | <b>0.48</b>                            | 1.15E+09                            | 4.74E+08                                  | 7.38E+08                                        | 10                        |
| Pre-3 Ga crust 3.5-3.0  | <b>3.3</b>            | 1.7E+09            | 4.6E+09                              | -                                    | 4.6E+09                              | 63                        | <b>4.00</b>                           | 2.00E+09                            | <b>0.68</b>                            | -                                      | <b>0.68</b>                            | 9.16E+08                            | 1.08E+09                                  | 1.82E+09                                        | 25                        |
| Post-3 Ga crust 3.0-2.5 | <b>-1.5</b>           | -7.4E+08           | 1.8E+09                              | 2.0E+09                              | 3.8E+09                              | 53                        | <b>4.00</b>                           | 2.00E+09                            | <b>5.48</b>                            | 0.0                                    | <b>5.49</b>                            | 8.25E+08                            | 1.18E+09                                  | 3.00E+09                                        | 42                        |
| 2.5-2.0                 | <b>3.0</b>            | 1.5E+09            | 1.8E+09                              | 3.5E+09                              | 5.3E+09                              | 74                        | <b>4.00</b>                           | 2.00E+09                            | <b>0.00</b>                            | 1.0                                    | <b>0.97</b>                            | 1.01E+09                            | 9.94E+08                                  | 3.99E+09                                        | 55                        |
| 2.0-1.5                 | <b>2.7</b>            | 1.4E+09            | 1.8E+09                              | 4.9E+09                              | 6.7E+09                              | 93                        | <b>4.00</b>                           | 2.00E+09                            | <b>0.00</b>                            | 1.3                                    | <b>1.29</b>                            | 6.82E+08                            | 1.32E+09                                  | 5.31E+09                                        | 74                        |
| 1.5-1.0                 | <b>2.2</b>            | 1.1E+09            | 1.8E+09                              | 6.0E+09                              | 7.8E+09                              | 108                       | <b>4.00</b>                           | 2.00E+09                            | <b>0.00</b>                            | 1.8                                    | <b>1.77</b>                            | 1.25E+09                            | 7.53E+08                                  | 6.06E+09                                        | 84                        |
| 1.0-0.5                 | <b>0.8</b>            | 4.0E+08            | 1.8E+09                              | 6.4E+09                              | 8.2E+09                              | 114                       | <b>4.00</b>                           | 2.00E+09                            | <b>0.01</b>                            | 3.2                                    | <b>3.21</b>                            | 1.30E+09                            | 6.99E+08                                  | 6.76E+09                                        | 94                        |
| 0.5-0                   | <b>-2.0</b>           | -1.0E+09           | 1.8E+09                              | 5.4E+09                              | 7.2E+09                              | 100                       | <b>3.49</b>                           | 1.75E+09                            | <b>0.01</b>                            | 5.5                                    | <b>5.50</b>                            | 1.31E+09                            | 4.39E+08                                  | 7.20E+09                                        | 100                       |
